1 **Predicting changes in bee assemblages following state transitions in North American drylands**

2

3 Melanie R. Kazenel<sup>1,†,\*</sup>

4 Karen W. Wright<sup>1,2,†</sup>

5 Julieta Bettinelli<sup>1</sup>

6 Terry L. Griswold<sup>3</sup>

7 Kenneth D. Whitney<sup>1</sup>

8 Jennifer A. Rudgers<sup>1</sup>

9

10 †co-first authors

11 \*corresponding author's email address: [mkazenel@unm.edu](mailto:mkazenel@unm.edu)

12

13 <sup>1</sup>Department of Biology, University of New Mexico, Albuquerque, NM 87131-0001, USA

14 <sup>2</sup>Department of Entomology, Texas A&M University, College Station, TX 77843-2475, USA

15 <sup>3</sup>USDA-ARS Pollinating Insects Research Unit, Utah State University, Logan, UT 84322-5310, USA

16 Drylands worldwide are experiencing ecosystem state transitions: the expansion of some  
17 ecosystem types at the expense of others. Bees in drylands are particularly abundant and diverse, with  
18 potential for large compositional differences and seasonal turnover across ecotones. To better  
19 understand how future ecosystem state transitions may influence bees, we compared bee assemblages  
20 and their seasonality among three dryland ecosystem types of the southwestern U.S. (Plains grassland,  
21 Chihuahuan Desert grassland, and Chihuahuan Desert shrubland). Using passive funnel traps, we caught  
22 bees during two-week intervals from March through October during 2002 – 2014. The resulting dataset  
23 included 302 bee species and >70,500 individuals. Bee abundance, composition, and diversity differed  
24 among ecosystems, indicating the potential for future ecosystem state transitions to alter bee assemblage  
25 composition in drylands. We also found strong seasonal turnover in bee species, suggesting that bee  
26 phenological shifts may accompany ecosystem state transitions. Common rather than rare species drove  
27 the observed trends, and both specialist and generalist bee species were indicators of each ecosystem  
28 type or month; these species could be informative sentinels of community-wide responses to future shifts.  
29 Our work suggests that predicting the consequences of global change for bee assemblages will require  
30 accounting for both within-year and among-ecosystem variation.

31

## 32 **Introduction**

33 Drylands worldwide are experiencing ecosystem state transitions: the expansion of some  
34 ecosystem types at the expense of others<sup>1,2</sup>. These transitions include encroachment of C<sub>3</sub> shrubland into  
35 C<sub>4</sub> grassland<sup>3</sup> and conversion of woodland to savanna<sup>4</sup>. It is through these transitions that the largest  
36 changes in dryland ecosystem processes are occurring<sup>5-7</sup>. State transitions can produce dramatic  
37 changes in carbon fluxes<sup>8,9</sup>, nutrient dynamics<sup>10,11</sup>, spatial heterogeneity in vegetation<sup>12</sup>, and consumer  
38 community composition<sup>13,14</sup>. Because drylands cover ~45% of land area on Earth<sup>15</sup> and support over 2  
39 billion people<sup>16</sup>, understanding how much dryland ecosystems currently differ in community composition  
40 can help to predict changes in future communities — and the ecosystem services they provide — under  
41 state transitions.

42 Bees may serve as important bio-indicators of state transitions and sentinels of altered  
43 ecosystem services<sup>17,18</sup>. In drylands, bees are important pollinators of both wild plants and agricultural

44 crops<sup>19,20</sup>, and are particularly abundant and diverse. North America's highest bee diversity occurs in the  
45 southwestern U.S. and northwest Mexico, and 75% of the continent's bee species are found in the  
46 western U.S.<sup>21,22</sup>. Relative to mesic ecosystems, drylands can also host higher proportions of specialist  
47 bee species, which pollinate one or a few closely related plant species<sup>23</sup>. For example, creosote bush  
48 (*Larrea tridentata* (DC.) Coville), a widespread and abundant shrub in North American warm deserts<sup>24</sup>, is  
49 visited by 22 documented specialist bee species<sup>25</sup>. Cacti also host many specialists<sup>26</sup>. Communities  
50 dominated by specialist bees may be less resilient to state changes or pollinator declines than  
51 communities dominated by generalist bees, which can buffer plants against crashes in other bee  
52 species<sup>27,28</sup>. Future ecosystem state transitions could therefore substantially influence bees in drylands,  
53 making it important to understand potential vulnerabilities of dryland bee assemblages to these shifts.

54         Understanding variation in bee composition among habitat types can shed light on how  
55 ecosystem state transitions will influence bee assemblages. Prior studies have largely focused on bee  
56 assemblage variation within agricultural environments, along urban-rural gradients, or with habitat  
57 fragmentation<sup>29-31</sup>, while fewer studies have compared natural ecosystems. For instance, in Spain, shrub  
58 encroachment into grasslands corresponded with higher pollinator richness but fewer pollinator visits to  
59 forbs<sup>32</sup>. In xeric environments, some studies have documented bee species turnover across relatively  
60 small spatial scales<sup>25,33,34</sup>. For instance, during a single growing season, one study found lower bee  
61 abundance and richness in desert scrubland relative to riparian sites within a 4 km<sup>2</sup> area in the Sonoran  
62 Desert<sup>33</sup>. In contrast, abundances of insect pollinator functional groups did not differ between creosote  
63 bush-dominated and adjacent annual forb-dominated microsites in the Mojave Desert<sup>35</sup>, although this  
64 study occurred on a smaller spatial scale with coarser taxonomic resolution. These contrasting results  
65 highlight the need for additional data to better predict the potential consequences for bee assemblages of  
66 specific state transitions in dryland ecosystems.

67         In addition, seasonal turnover in bee species composition suggests the potential for climate  
68 change to produce shifts in bee phenology<sup>36</sup>. Some bees may cue on climate variables for their  
69 emergence as adults, with temperature or precipitation conditions triggering the emergence of bee  
70 species at different times of year<sup>37-39</sup>. High temporal turnover in bee assemblage composition could thus  
71 indicate dominance of species with phenologies closely tied to climate, which may be particularly

72 susceptible to phenological shifts under climate change. Understanding bee assemblage seasonality in  
73 ecosystem types predicted to expand or contract under climate change could thus be important for  
74 predicting bee assemblage responses to state transitions. However, while bee composition is well  
75 documented to vary seasonally within a community<sup>40–42</sup>, few studies have compared seasonal patterns  
76 among ecosystem types to discern how state transitions may shift bee phenology at the landscape scale.  
77 Seasonal trends in bee abundance and richness were found to differ between natural and human-altered  
78 landscape types during a single year in California, USA<sup>43</sup>, and among agricultural land use classes during  
79 3 years in New Hampshire, USA<sup>44</sup>. However, we lack studies that use long-term data to elucidate how  
80 general patterns of bee seasonality differ among natural ecosystem types that are expanding versus  
81 contracting.

82 This study compared bee assemblages and their seasonality among sites representing three  
83 dryland ecosystem types of the southwestern U.S.: Chihuahuan Desert shrubland, Chihuahuan Desert  
84 grassland, and Plains grassland. Our sites occurred within a relatively small area (within 2-10 km of one  
85 another) that encompassed ecotones between the types, and shared the same regional pool of bee  
86 species. We used 13 years of monthly bee trap data to address two questions: (1) How much do bee  
87 assemblage abundance, composition, and diversity differ among major southwestern U.S. ecosystem  
88 types? (2) Do dryland ecosystem types differ in their degree of seasonal variation in bee abundance,  
89 composition, or diversity? We examined patterns among ecosystem types and months of the year by  
90 averaging across the time series, enabling us to identify general trends. Whereas this analysis focused on  
91 intra-annual and among-habitat variation in bee composition, a companion study will report inter-annual  
92 change over the time series, providing substantial additional complexity to the analysis.

93

## 94 **Methods**

### 95 *Ecosystem types*

96 The Sevilleta National Wildlife Refuge (NWR; Socorro, NM) includes five ecosystem types that  
97 together represent ~80 million ha of the southwestern U.S. We focused on three major ecosystem types:  
98 Chihuahuan Desert shrubland, which is dominated by creosote bush (*Larrea tridentata*), Chihuahuan  
99 Desert grassland, which is dominated by black grama grass (*Bouteloua eriopoda* (Torr.) Torr.), and Plains

100 grassland, which is dominated by blue grama grass (*Bouteloua gracilis* (Willd. Ex Kunth) Lag. Ex Griffiths)  
101 (Table 1). Transitions among these ecosystem types are predicted to occur under climate change, with  
102 Chihuahuan Desert shrubland encroaching upon Chihuahuan Desert grassland, which is predicted to  
103 replace Plains grassland<sup>45–47</sup>. In our study, the two Chihuahuan Desert sites were separated by ~2 km;  
104 the Plains grassland site was ~10 km from the Chihuahuan Desert sites (Table 1).

#### 105 *Bee collection*

106 Bees were sampled along five transects located within each of the three focal ecosystem types.  
107 To sample bees, we installed one passive funnel trap at each end of five 200 m transects/site. Each trap  
108 consisted of a 946 mL paint can filled with ~275 mL of propylene glycol and topped with a plastic  
109 automotive funnel with the narrow part of the funnel sawed off (funnel height = 10 cm, top diameter = 14  
110 cm, bottom diameter = 2.5 cm; Supplementary Fig. S1). The funnels' interiors were painted with either  
111 blue or yellow fluorescent paint (Krylon, Cleveland, OH or Ace Hardware, Oak Brook, IL). On each  
112 transect, we randomly assigned one trap to be blue and the other to be yellow (total across the three  
113 sites:  $N = 30$  traps, with 15 traps/color). Because different bee taxa are known to be attracted to blue  
114 versus yellow<sup>48</sup>, we summed the samples collected in the two traps on a given transect. Each trap was  
115 placed on a 45 cm high platform that was surrounded by a 60 cm high chicken wire cage to prevent  
116 wildlife and wind disturbance (Supplementary Fig. S1). Funnel traps provide a measure of bee activity,  
117 not a measure of presence, and may be biased by bee taxon and sociality<sup>49,50</sup>. From 2002 to 2014, bees  
118 were sampled each month from March through October. Traps were opened each March as close as  
119 possible to the first day of spring, and left open for 14 d, after which the bee specimens were collected.  
120 The traps were then closed for 14 d. This two-week cycle was repeated through October. Bees were  
121 rinsed and stored in 70% ethanol until processed.

#### 122 *Bee identification*

123 Bees were identified to species by K.W.W. and T.L.G. Certain groups of bees could not be  
124 identified to species, either because there are no practicing experts in the bee group and species are  
125 unnamed for our study region, or because there are no revisions within the bee group to separate named  
126 from unnamed species. In these cases, we separated females into morphotypes as best as possible. The  
127 males of these groups could not be reliably linked to the females and were therefore excluded from the

128 dataset. The major groups treated in this manner were the genera *Sphecodes*, *Pseudopanurgus*, and  
129 *Nomada*, the subgenera *Dialictus* and *Evylaeus* of the genus *Lasioglossum*, and the subgenus  
130 *Micrandrena* of *Andrena*. We excluded *Nomada* from our analyses due to low abundance and lack of  
131 ability to distinguish among species. New species of relatively well-known genera were recognized, and  
132 the qualifiers nr. or aff. were used with uncertain identifications. Voucher specimens were deposited at  
133 the University of New Mexico's Museum of Southwestern Biology and the USDA-ARS Pollinating Insects  
134 Research Unit's U.S. National Pollinating Insects Collection. Information related to these specimens is  
135 available via the Symbiota Collections of Arthropods Network (<https://scan-bugs.org>).

### 136 *Analysis*

137 Dataset. We created a species matrix in which cells contained the mean abundance of each bee  
138 species for each month of collection, averaged over the years of collection (2002 – 2014). Each row was  
139 a unique trapping transect, with five transects per ecosystem type per month ( $N = 120$  observations).  
140 Means were calculated using the <reshape2> package<sup>51</sup> in R version 3.4.2<sup>52</sup>. To examine whether  
141 assemblage-level patterns were driven by common or rare species, we ran all abundance, composition,  
142 and diversity analyses (described below) on the full dataset, on a dataset with singleton bee species  
143 (those caught only on a single transect, in a single month) removed, and finally on a subset of the dataset  
144 containing only the bee species that were present in >5% of the samples.

145 Overview. Analyses addressed our two key questions within one set of statistical models  
146 (described below). First, (1) How much do bee assemblage abundance, composition, and diversity differ  
147 among major southwestern U.S. ecosystem types? was determined by the statistical significance and  
148 magnitude of the effect of ecosystem type in our models. We also compared the effect size of ecosystem  
149 type against the effect size of month of sampling to estimate the relative importance of inter-ecosystem  
150 versus seasonal variability. Then, to address (2) Do dryland ecosystem types differ in their degree of  
151 seasonal variation in bee abundance, composition, or diversity? we evaluated whether the interaction  
152 between ecosystem type and month of sampling was statistically significant, indicating that ecosystems  
153 differed in the seasonality of bee abundance, composition, or diversity.

154 Bee assemblage composition and turnover. For bee composition, we calculated Bray-Curtis  
155 similarities in Primer version 6.1.13<sup>53</sup>. We then tested for the influence of ecosystem type, month of

156 sampling, and the random effect of transect, which was nested within ecosystem type to account for the  
157 repeated measures design, using perMANOVA (version 1.0.3) with 9999 permutations of residuals under  
158 a reduced model. We additionally examined whether ecosystem types or months differed in bee  
159 assemblage dispersion using permDISP in Primer<sup>53</sup>. We visualized assemblage composition with non-  
160 metric multidimensional scaling analysis (NMDS) implemented with 500 restarts in Primer. For each  
161 ecosystem type, we assessed bee species turnover among months, as well as the rate of community  
162 change, using the <codyn> package in R<sup>54</sup>. Finally, to identify which taxa contributed most to bee  
163 assemblage (i) divergence among ecosystem types and (ii) divergence among months within each  
164 ecosystem type, we calculated Dufrene-Legendre indicator species values using the indval function in the  
165 <labdsv> R package<sup>55</sup>.

166 Bee diversity and abundance. For bee diversity, we calculated the Shannon diversity index ( $H'$ ),  
167 species richness, and evenness (Pielou's  $J$ ) using the <vegan> package in R<sup>56</sup>. We then used linear  
168 mixed effects models to examine the influences of ecosystem type, sampling month, and their interaction  
169 (fixed effects), as well as transect identity (random effect nested within ecosystem type), on these three  
170 responses, as well as on total bee abundance (function lmer, <lme4> package in R)<sup>57</sup>. When there was a  
171 significant ecosystem type x sampling month interaction, we tested *a priori* contrasts for pairs of months  
172 within each ecosystem type and for pairs of ecosystem types within each month using Tukey-Kramer  
173 multiple comparisons in the <emmeans> package in R<sup>58</sup>.

174

## 175 **Results**

### 176 *The dataset*

177 We captured a total of 70,951 individuals representing 302 species during the 13 years of  
178 monthly trapping (see Supplementary Table S1 for a full species list). Species were distributed across 6  
179 families and 56 genera (Supplementary Table S1 and Fig. S2). Our dataset was dominated by a small  
180 number of abundant species and contained a large number of rare species (Supplementary Fig. S3). The  
181 most commonly collected species were *Lasioglossum semicaeruleum* (36% of all collected specimens),  
182 *Agapostemon angelicus* (21%), *Diadasia rinconis* (7%), *Melissodes tristis* (5%), *Anthophora affabilis* (5%),

183 and *Eucera lycii* (3%). Amongst the collected species, 30% were singletons, and 58% were found in <5%  
184 of all samples.

185 *Bee assemblage composition: temporal variation surpassed differences among dryland ecosystem types*

186 Variation among ecosystems. All ecosystems significantly diverged in bee assemblage  
187 composition, and this pattern was present during all months (Table 2, Fig. 1). The greatest difference  
188 among ecosystems occurred in October, when the Plains grassland bee assemblage diverged most  
189 strongly from the Chihuahuan Desert shrubland (mean similarity: 41.4,  $P = 0.0089$ ) and also diverged  
190 from the Chihuahuan Desert grassland (mean similarity: 51.6,  $P = 0.0080$ ). The three ecosystem types  
191 did not differ in assemblage dispersion ( $F_{2,117} = 0.52$ ,  $P = 0.71$ ), indicating similar levels of temporal beta-  
192 diversity among ecosystem types (Fig. 1).

193 Indicators of variation among ecosystems. We identified 43 bee species as ecosystem indicators  
194 according to their Dufrene-Legendre (DL) indicator species values (Table 3). Of these, 21 species were  
195 indicators of Chihuahuan Desert shrubland, 14 species were indicators of Plains grassland, and 8 species  
196 were indicators of Chihuahuan Desert grassland. All three ecosystems had indicator species within the  
197 families Andrenidae, Apidae, Halictidae, and Megachilidae, and one Plains grassland indicator species  
198 was in the family Colletidae (Table 3, Fig. 2). In all three ecosystems, *Lasioglossum semicaeruleum* (an  
199 indicator of the Desert grassland), *Agapostemon angelicus* (an indicator of Plains grassland), *Diadasia*  
200 *rinconis*, and *Melissodes tristis* were among the five most abundant bee species (Fig. 2). *Anthophora*  
201 *affabilis* was also within the five most abundant species in the Plains and Chihuahuan Desert grasslands,  
202 while *Perdita larreae* (a creosote bush specialist) was abundant in and an indicator of the Chihuahuan  
203 Desert shrubland (Fig. 2).

204 Temporal variation. The month of sample collection explained an order of magnitude more  
205 variation in bee assemblage composition than did ecosystem type (Table 2, Fig. 3). Generally,  
206 assemblages diverged between the early and late months of the year and converged during the middle of  
207 the summer. Across ecosystems, the pair of months most divergent in bee composition was March versus  
208 October (mean similarity = 12.7,  $P = 0.0001$ ). In contrast, June and July were most similar in bee  
209 composition (mean similarity = 64.0,  $P = 0.0001$ ).



210 Months additionally differed from one another in the magnitude of assemblage dispersion, a  
211 metric that captures the degree of beta-diversity across both sites and transects (Table 2, Fig. 3). The  
212 strongest differences in beta-diversity were between March or June, which had the smallest multivariate  
213 dispersions (mean  $\pm$  s.e., March:  $21.0 \pm 1.5$ , June:  $20.4 \pm 0.8$ ), against October, which had the largest  
214 average dispersion across ecosystems ( $29.8 \pm 1.8$ ).

215 *Bee abundance and diversity: temporal variation exceeded variation among dryland ecosystems*

216 Abundance. As with composition, across months, ecosystems diverged significantly from one  
217 another in total bee abundance (Table 4). Bee abundance was on average 43% lower in the Chihuahuan  
218 Desert shrubland relative to the two grassland sites from March through July (Fig. 4a). However,  
219 abundances within the ecosystems converged in August, and abundance differences disappeared in  
220 September and October (Fig. 4a), as indicated by a significant interaction between ecosystem type and  
221 month of collection (Table 4: Ecosystem x Month,  $P < 0.0001$ ).

222 Diversity. Ecosystems also diverged in bee diversity as measured by the Shannon index and  
223 Pielou's evenness (Table 4). Differences in Shannon diversity (Fig. 4b) among ecosystems were more  
224 strongly driven by evenness (Fig. 4d) than by richness (Fig. 4c). On average across all months of  
225 sampling, the Chihuahuan Desert shrubland ecosystem had the highest bee Shannon diversity and  
226 evenness, with these diversity metrics 5% (Shannon diversity) and 2% (evenness) higher than in the  
227 Plains grassland. In turn, Plains grassland diversity metrics were 16% (Shannon diversity) and 12%  
228 (evenness) higher than the Chihuahuan Desert grassland. In contrast, on average across months, the  
229 ecosystems did not significantly differ in bee species richness (Table 4, Fig. 4c).

230 Importantly, differences among ecosystems in all diversity metrics varied by month of the year  
231 (Fig. 4, Table 4: Ecosystem x Month – Shannon diversity:  $P < 0.0001$ , richness:  $P = 0.0137$ , evenness:  $P$   
232  $< 0.0001$ ), indicating that dryland ecosystem types differed in their degree of seasonal variation in bee  
233 diversity (Question 2). Specifically, Shannon diversity was greater in the Chihuahuan Desert shrubland  
234 than in the Desert grassland in all months except for March; differences in Shannon diversity were largest  
235 in May and September, when Shannon diversity respectively was 38% and 33% higher in the  
236 Chihuahuan Desert shrubland relative to grassland (Fig. 4b). Shannon diversity was also higher in the  
237 Chihuahuan Desert shrubland relative to Plains grassland in April, July, August, and October (Fig. 4b).

238 The largest difference occurred in October, in which Shannon diversity was 31% higher in the  
239 Chihuahuan Desert shrubland than Plains grassland. However, this trend was reversed in both March  
240 and September, when Shannon diversity was 19% and 16% higher, respectively, in Plains grassland than  
241 in shrubland (Fig. 4b). The two grassland ecosystems differed in Shannon diversity in March, May, June,  
242 and September, with greater Shannon diversity in the Plains relative to Chihuahuan Desert grassland in  
243 all of these months (Fig. 4b).

244 *Dryland ecosystems diverged in the magnitude of seasonal variation in bee assemblage composition,*  
245 *abundance, and diversity*

246 Assemblage composition. Bee assemblage composition varied strongly among months, with the  
247 magnitude of seasonal change differing among ecosystems (Figs. 3,5; Table 2: Ecosystem X Month,  $P =$   
248 0.0001). The Chihuahuan Desert grassland had the greatest seasonal turnover in bee species  
249 composition (Fig. 3b), and the highest rate of compositional change from month to month (Fig. 6). In  
250 contrast, the Chihuahuan Desert shrubland had the lowest seasonal composition change (Figs. 3c,6),  
251 with low turnover between July and August, and between August and September, compared to the other  
252 ecosystems (Fig. 5). Among months, in all ecosystem types, bee species composition differed most  
253 strongly between March and either September (Plains grassland: mean similarity = 16.4,  $P = 0.0077$ ) or  
254 October (Desert grassland: mean similarity = 9.2,  $P = 0.0091$ ; shrubland: mean similarity = 11.7,  $P =$   
255 0.0070) (Fig. 3). In contrast, in all ecosystems, June and July were most compositionally similar to one  
256 another, with low turnover between them (Figs. 3,5; Plains grassland: mean similarity = 76.2,  $P = 0.0091$ ;  
257 Desert grassland: mean = 72.42,  $P = 0.0077$ ; Desert shrubland mean = 70.4,  $P = 0.0156$ ). Seasonal  
258 patterns in bee assemblage composition were largely driven by common rather than rare species, as  
259 indicated by very few qualitative differences in analysis outcomes when excluding singletons or  
260 moderately rare species (see Supplementary Fig. S4).

261 Abundance. Like species composition, total bee abundance also varied seasonally across the  
262 three ecosystem types (Table 4), and ecosystem types exhibited differing trends in total abundance over  
263 the course of the season (Fig. 4a). In the Chihuahuan Desert grassland, bee abundance increased from  
264 March to April, then generally declined through the rest of the season (Fig. 4a). In contrast, the Plains  
265 grassland had similar levels of bee abundance in March and April ( $df = 84$ ,  $t = -1.13$ ,  $P = 0.95$ ), followed

266 by a ~50% decrease in abundance between April and May ( $df = 84, t = 11.12, P < 0.0001$ ) and a 66%  
267 increase in abundance between May and June ( $df = 84, t = -6.99, P < 0.0001$ ). Between July and August,  
268 while bee abundance decreased ~30% within both the Chihuahuan Desert grassland ( $df = 84, t = 4.62, P$   
269  $= 0.0004$ ) and Plains grassland ecosystems ( $df = 84, t = 5.93, P < 0.0001$ ), it increased by 40% within the  
270 Chihuahuan Desert shrubland ( $df = 84, t = -3.86, P = 0.0053$ ) (Fig. 4a). Across ecosystem types, bee  
271 abundances were generally lower in September and October relative to all other months (Fig. 4a).

272 Diversity. Within each ecosystem, most months had similar levels of species richness, with some  
273 exceptions (Fig. 4c). Notably, there was a sharp decline in richness between August and October across  
274 all three ecosystems (Fig. 4c). During this period, richness declined by 70% within the Chihuahuan Desert  
275 grassland ( $df = 84, t = 11.18, P < 0.0001$ ) and by 60% within both the Plains grassland ( $df = 84, t = 10.92,$   
276  $P < 0.0001$ ) and Desert shrubland ( $df = 84, t = 11.18, P < 0.0001$ ). However, month-to-month trends in  
277 Shannon diversity and evenness diverged among ecosystems (Fig. 4b,d). Patterns in total abundance,  
278 Shannon diversity, richness, and evenness were all largely driven by common rather than rare species  
279 (see Supplementary Fig. S5).

280 Indicators of temporal variation within ecosystem types. Certain bee taxa were indicators of  
281 specific months across all three ecosystems according to their DL indicator values (Supplementary  
282 Tables S3-S6). These included *Osmia* species, *Eucera lycii*, *Anthophora porterae*, and *Melecta pacifica*  
283 (March), *Dioxys* and *Anthophora* species (April), *Diadasia australis* and *rinconis* (June), *Martinapis*  
284 *lutericornis*, *Halictus ligatus*, and *Melissodes tristis* (July), and *Perdita semicaerulea* and *marcialis*  
285 (August) (Supplementary Tables S3-S6). September and October lacked indicator species shared by all  
286 ecosystems.

287 In contrast, certain bee taxa were only characteristic of a given month within one or two  
288 ecosystems (Supplementary Tables S3-S6). For instance, in June, the shrubland site had 5 indicator  
289 species in the genus *Lasioglossum*; one of these was also characteristic of the desert grassland site  
290 (Supplementary Tables S3,S5,S6). In July, *Perdita* species (Andrenidae) were indicators of the  
291 Chihuahuan Desert sites but not the Plains site, the grassland sites had indicator species in the Halictidae  
292 (especially *Lasioglossum*), and differing members of the Apidae were characteristic of different  
293 ecosystems (Supplementary Tables S3-S6). In September, *Perdita* species (Andrenidae) were

294 characteristic of the Plains grassland, *Macrotera* (Andrenidae) were characteristic of the desert sites, and  
295 differing members of the Apidae were characteristic of each site (Supplementary Tables S3-S6). Finally,  
296 25 species were indicators of a particular month in one or two ecosystem types, and were then indicators  
297 of a different month, often the following one, in the other ecosystem(s) (Supplementary Table S3).

298

## 299 **Discussion**

300 We found large variation in bee assemblages and their seasonality among three dryland  
301 ecosystem types of the southwestern U.S. These results indicate the potential for future ecosystem state  
302 transitions to alter bee assemblage composition in drylands. Overall, ecosystem types in our study had  
303 similar levels of bee species richness but differed from one another in species evenness and composition.  
304 These results imply that state transitions could alter the presence/absence and relative abundances of  
305 bee species in our system, bringing about substantial assemblage reordering.

306 Our data suggest that the most probable state transitions in our southwestern U.S. drylands –  
307 shrub encroachment into Desert grassland and Desert grassland encroachment into Plains grassland<sup>59,60</sup>  
308 – could substantially reshape bee communities. For the grass-to-shrub transition, our results suggest that,  
309 on average over the season, total bee abundance will decrease while richness, Shannon diversity, and  
310 Pielou's evenness will increase. In contrast, our findings predict that richness, Shannon diversity, and  
311 evenness will decrease while total abundance will remain relatively unchanged if Desert grassland  
312 replaces Plains grassland. The simultaneous occurrence of these state transitions could therefore  
313 substantially alter the distribution of bees and their ecosystem services across the landscape.

314 A number of factors complicate accurately predicting the outcomes of ecosystem state transitions  
315 for bees. First, bees may alter their foraging patterns based on floral resource availability<sup>61</sup>, and could  
316 respond to shifting vegetation composition by foraging for greater distances if floral resources are scarce  
317 in a particular location<sup>62</sup>. However, foraging range can differ greatly among bee species based on body  
318 size<sup>63</sup>, and the energetic costs of longer foraging distances may be high<sup>64</sup>. These factors could mediate  
319 the consequences of ecosystem state transitions for bee assemblage composition in ways that merit  
320 further research, as they have been little-examined<sup>61</sup>. Our finding that particular bee species were  
321 indicators of different months in different ecosystem types suggests that bees in our system may shift

322 their foraging locations based on floral availability (though they could alternatively be emerging at different  
323 times of year in different ecosystems; see subsequent paragraphs) highlighting the importance of  
324 examining foraging dynamics in the future.

325         Second, state transitions may create positive feedbacks that accelerate their pace and influence  
326 bee responses<sup>1</sup>. Creosote bush expansion, which is limited by minimum nighttime temperature, is aided  
327 by a feedback in which a creosote individual creates a warmer microclimate around itself, which can  
328 buffer it from low temperatures, in turn creating conditions favorable to further creosote establishment<sup>47,65</sup>.  
329 This accelerated temperature increase could influence the relative dominances of bee species, which  
330 may differ in their temperature responses. For instance, in one *Osmia* species, increased temperature  
331 during larval development caused decreased prepupal weight and increased adult mortality<sup>66</sup>, and in  
332 another species it increased the frequency of 1-year rather than 2-year lifecycles<sup>39</sup>. If accelerated bee  
333 assemblage shifts result in pollen limitation for plants already threatened by shrub encroachment, the  
334 feedback could be enhanced, further increasing the pace of encroachment.

335         Our results contribute to a number of global studies suggesting how state transitions may  
336 influence drylands arthropod communities. For instance, in the Chihuahuan Desert, ant species  
337 composition varied with mesquite (*Prosopis glandulosa*) encroachment level, but richness and abundance  
338 did not<sup>67</sup>. At the Sevilleta NWR, grasshopper assemblage similarity decreased with elevational variation in  
339 shrub and *Bouteloua* sp. grass cover<sup>68</sup>. Similarly, at our study sites, the Desert grassland and shrubland  
340 had distinct ground-dwelling arthropod assemblages, with higher abundance but similar richness in the  
341 grassland relative to the shrubland, as we found<sup>14</sup>. These findings together suggest that Chihuahuan  
342 Desert state transitions may similarly influence abundance and diversity patterns in several arthropod  
343 groups. However, global evidence suggests that shrub encroachment can differentially affect arthropod  
344 taxa<sup>3</sup>. For instance, shrub-encroached pastures in Spain had higher pollinator richness but fewer  
345 pollinator visits to forbs relative to shrub-absent sites<sup>32</sup>, contrasting with our finding of little difference in  
346 bee richness between shrub- and grass-dominated sites. In the Kalahari Desert, shrub encroachment  
347 corresponded with greater abundances of some ground-dwelling arthropod groups but declines in  
348 others<sup>69</sup>. Our results thus add to understanding of how widely-occurring ecosystem transitions may affect  
349 arthropods differentially across space.

350 Our work also bolsters evidence from human-altered landscapes about how bee assemblages  
351 vary at a landscape scale. For instance, as in our study, bee abundance but not richness changed with  
352 land use intensity in tropical agroecosystems for solitary bees, which comprised the majority of our  
353 dataset<sup>29</sup>. In contrast, a different study found shifts in bee species composition but not abundance or  
354 diversity among forest fragments<sup>30</sup>. Other studies have documented strong differences in both abundance  
355 and richness of bees among habitat types<sup>33,70,71</sup>. These findings highlight the importance of separately  
356 examining trends within particular ecosystem and land-use types to comprehensively predict future  
357 patterns.

358 Month-to-month differences in bee species composition were an order of magnitude stronger than  
359 ecosystem differences in our study. This finding suggests potential susceptibility of bees in all ecosystem  
360 types to climate change-induced phenological shifts<sup>36</sup>. In particular, climate models for the southwestern  
361 U.S. predict less precipitation in July and August, and more in September and October, resulting in an  
362 extended period of aridity between spring rains and the start of the summer monsoon<sup>72</sup>. Evidence  
363 suggests that desert bees, most of which nest underground, frequently cue on precipitation for their  
364 emergence<sup>37,38</sup>. Under altered monsoon precipitation timing, bees that currently emerge in July or August  
365 might shift emergence to September and October, leading to higher levels of bee abundance and  
366 richness at all sites during these months. These differences could be particularly pronounced in the  
367 Chihuahuan Desert shrubland ecosystem, for which bee abundance, Shannon  $H'$ , richness, and Pielou's  
368  $J$  (evenness) were all highest in July or August. The Chihuahuan Desert grassland could also be  
369 particularly susceptible to altered dynamics, given that it had the strongest seasonal turnover. Substantial  
370 assemblage reordering among months could occur if different bee species shift their phenological timing  
371 to different degrees, which could have landscape-level consequences given that the Chihuahuan Desert  
372 ecosystem types are expected to expand in the future<sup>45-47</sup>. In addition, for social bees that are active  
373 throughout the growing season, such as those in the family Halictidae<sup>73</sup>, loss of floral resources due to  
374 midsummer aridity could cause abundance declines or colony death. Predicting the consequences of  
375 ecosystem state transitions will thus require considering bee assemblage seasonality in ecosystem types  
376 that are expanding versus contracting.

377 Regional climate predictions for the southwestern U.S. are dire – the probability of decadal  
378 droughts is nearly 100% by the end of the century<sup>74</sup>. Such droughts could differentially affect bees with  
379 differing phenologies and life history strategies, and could lead to bee assemblage reordering. For  
380 instance, many desert bees can remain in diapause for one year or more, emerging when conditions are  
381 favorable<sup>37,38</sup>. In one of the few studies on the topic, fewer bees emerged during a drought year compared  
382 to the previous and following years in the northwestern Chihuahuan Desert<sup>38</sup>. A greater proportion of  
383 specialist than generalist bees remained in diapause, and the specialists that emerged were those whose  
384 host plants bloom under low precipitation conditions. For *Larrea tridentata*, which requires precipitation to  
385 bloom<sup>75</sup>, few specialist bees emerged during the drought, suggesting that these specialists time their  
386 emergence with their host plant<sup>38</sup>. Differences among ecosystem types in their dominant flowering plant  
387 species, their associated specialist versus generalist bee species, and their seasonality could therefore  
388 lead to strong bee assemblage divergence among them as dominant bee species in each ecosystem  
389 respond differentially to increased drought and shifted precipitation timing, with landscape-level bee  
390 assemblage changes occurring as some ecosystems expand and others contract. Future analyses will  
391 explore connections between bee abundance, diversity, and composition and individual aspects of  
392 climate change over our time series.

393 Our findings of strong bee assemblage seasonality are consistent with work indicating high  
394 temporal turnover in plant-pollinator interactions in subalpine and alpine communities over the course of  
395 the growing season<sup>41,76</sup>. Seasonal variation in plant-pollinator networks has also been documented in  
396 agricultural landscapes<sup>44</sup>. While our study was not designed to examine plant-pollinator interactions, our  
397 results set the stage for considering how plant-pollinator networks could be altered by ecosystem state  
398 transitions and climate-induced phenological shifts of bee species.

399 In our dataset, common rather than rare bee species drove the trends in abundance, diversity,  
400 and composition that we observed over both space and time. Considering these species' ecologies may  
401 thus be particularly important for predicting the consequences of ecosystem state transitions, and some  
402 species may portend change in the bee assemblage as a whole<sup>77</sup>. Among the most abundant bees in our  
403 dataset, three species (*Agapostemon angelicus*, *Lasioglossum semicaeruleum*, and *Melissodes tristis*)  
404 were broad generalists that collect pollen from plants of many families<sup>38,78</sup>, suggesting that plants visited

405 by these and other bees could be buffered to a certain extent if there are future bee declines. However,  
406 specialist bees were also among the most abundant: *Diadasia rinconis* is a specialist on Cactaceae<sup>79</sup>,  
407 *Anthophora affabilis* is a generalist with a strong preference for *Astragalus*, and *Perdita larreae* is a  
408 narrow specialist on *Larrea tridentata*<sup>23,80</sup>. The consequences of ecosystem state transitions for these bee  
409 species may thus depend on shifts in their host plants. For instance, expansion of *Larrea tridentata* could  
410 benefit populations of *P. larreae* and other creosote bush specialist bees, and possibly lead to stronger  
411 competitive dynamics among creosote specialists and generalists under future conditions.

412 Our study identified bee species as indicators of each ecosystem type; monitoring these species  
413 could help to illuminate the community-level consequences of ecosystem state transitions. The  
414 Chihuahuan Desert shrubland had more indicator species than the other two ecosystem types,  
415 suggesting that its future expansion could bring about distinctive assemblage shifts. The strongest  
416 indicators of the shrubland included *Perdita larreae*, which specializes on *Larrea tridentata*, and *P.*  
417 *diversa*, which specializes on *Tiquilia* spp., plants only found at the shrubland site. Abundance increases  
418 of these bee species could thus signal effects of shrubland expansion on pollinator communities.  
419 Similarly, in the Plains grassland, one indicator species (*Colletes scopiventer*) specializes on  
420 *Chamaesaracha* spp., which are present in all three ecosystems but are most abundant in the Plains  
421 grassland. Future decreases in the abundance of *C. scopiventer* could signal community-level shifts  
422 accompanying the declining dominance of the Plains grassland. However, the remaining indicator species  
423 of the two grassland ecosystems were broad generalists. Factors other than plant community  
424 composition, such as nesting habitat preferences, may thus underlie their restriction to particular sites,  
425 and they may be relatively less susceptible to climate-induced plant community shifts. This could also be  
426 the case for *Macrotera portalis*, an indicator of the shrubland but a specialist on *Sphaeralcea* spp.<sup>81</sup>,  
427 which is common in all three ecosystem types, and for generalist bee species that were indicators of the  
428 shrubland. The spatial distribution of suitable nesting habitat also merits future consideration in that  
429 specialist bees could be negatively affected if their plant hosts shift their ranges away from potential  
430 nesting sites.

431 In addition, cleptoparasitic bees were among our identified indicator species. These included one  
432 indicator of the Chihuahuan Desert shrubland (*Neolarra vigilans*) and three of the Plains grassland



433 (*Melecta alexanderi* and two *Sphecodes* species). Not surprisingly, in the cases of *Neolarra* and *Melecta*,  
434 their bee hosts, *Perdita* and *Anthophora*, were also among indicators of the same ecosystem types.  
435 Cleptoparasitic bees may be particularly good indicators of environmental change, as they are relatively  
436 diverse, and are known to be among the first bee functional groups to respond to disturbance<sup>82</sup>.  
437 Monitoring the abundances of these species could indicate shifts in bee assemblage dynamics as  
438 ecosystem state transitions occur. Cleptoparasitic species were also amongst indicators of particular  
439 months, frequently in tandem with possible hosts, and may thus be useful for tracking phenological  
440 responses to environmental change<sup>82</sup>. For example, both *Melecta alexanderi* and *M. bohartorum* were  
441 indicators of the shrubland site in March, but were indicators of the grassland sites in April, suggesting the  
442 possibility of altered emergence timing under the warmer microclimate conditions of the shrubland<sup>47,65</sup>,  
443 and thus susceptibility to phenological shifts in response to increasing temperature.

444 We also identified bee species that were characteristic of particular times of year across  
445 ecosystem types. Monitoring these species could enable the detection of broad, cross-site phenological  
446 shifts that may occur in the future. For instance, *Osmia*, *Anthophora*, and *Diadasia* species may be  
447 monitored to consider shifting pre-monsoon bee phenology, and *Perdita* species may be used to study  
448 shifts in emergence timed with monsoon rains. Future publications using these data will investigate inter-  
449 annual bee assemblage differences and relationships with climate variables.

450 Finally, we identified bee species that were characteristic of particular months only in specific  
451 ecosystems. Among these, certain specialist bee species may be candidates for detecting important  
452 phenological shifts within ecosystems, identifying phenological differences among ecosystems, and  
453 tracking how specialists versus generalists respond to climate shifts. For instance, March in the  
454 Chihuahuan Desert ecosystems had indicator species that likely specialize on Fabaceae (*Ashmeadiella*  
455 *erema* and *A. rubrella*), and April in the grassland sites had a specialist on Brassicaceae (*Dufourea*  
456 *pulchricornis*). In the Chihuahuan Desert ecosystem types, specialists of creosote bush were  
457 characteristic of May, corresponding with creosote's spring bloom<sup>75</sup>, June had Cactaceae specialists  
458 (*Diadasia* sp.) timed with that family's bloom<sup>79</sup>, and July had specialists on Asteraceae (*Perdita ignota*  
459 *ignota*, *P. callicerata*, *P. fallax*, and *P. albovittata*) and *Tiquilia* sp. (*P. diversa*). In contrast, specialists on  
460 Asteraceae (*Melissodes coreopsis*, *P. ignota ignota*, and *P. callicerata*) were indicators of August in the

461 Plains grassland, suggesting a shift in the importance of particular floral resources and/or differing  
462 phenological patterns among ecosystem types. In August, the Chihuahuan Desert sites were  
463 characterized by numerous creosote specialists, as documented in several studies<sup>23,38</sup>, including  
464 *Hesperapis larreae*, *P. semicaerulea*, and *P. larreae*. These species may be candidates for examining  
465 how delayed monsoon influences bee phenology. The *Sphaeralcea* specialist *Macrotera portalis*<sup>81</sup> was an  
466 August indicator in the shrubland, but other *Sphaeralcea* specialists were characteristic of September in  
467 both Chihuahuan Desert ecotypes; perhaps competitive dynamics were responsible for this difference.  
468 These examples illustrate the suite of factors that could be important to consider to predict bee presence  
469 and seasonality across the landscape.

470 Our analysis of 13 years of bee assemblage data spanning 302 species suggests that future  
471 dryland ecosystem state transitions, by themselves, may alter bee species' relative abundances and  
472 presence/absence. Strong bee assemblage seasonal turnover, particularly in ecosystems predicted to  
473 expand, indicates the potential for bee phenological shifts to accompany state transitions, potentially  
474 reordering communities. Our results indicate that predicting the consequences of global change for bee  
475 assemblages will require accounting for both within-year and among-ecosystem variation.

476

#### 477 **Data availability**

478 The data generated and analyzed during the current study will be available upon publication in  
479 the Environmental Data Initiative (EDI) Data Portal (<https://portal.edirepository.org>).

480

#### 481 **References**

- 482 1. D'Odorico, P., Bhattachan, A., Davis, K. F., Ravi, S. & Runyan, C. W. Global desertification: drivers  
483 and feedbacks. *Adv. Water Resour.* **51**, 326–344 (2013).
- 484 2. Bestelmeyer, B. T. *et al.* Desertification, land use, and the transformation of global drylands. *Front.*  
485 *Ecol. Environ.* **13**, 28–36 (2015).
- 486 3. Eldridge, D. J. *et al.* Impacts of shrub encroachment on ecosystem structure and functioning: towards  
487 a global synthesis. *Ecol. Lett.* **14**, 709–722 (2011).

- 488 4. Allen, C. D., Breshears, D. D. & McDowell, N. G. On underestimation of global vulnerability to tree  
489 mortality and forest die-off from hotter drought in the Anthropocene. *Ecosphere* **6**, art129 (2015).
- 490 5. Sala, O. E. & Maestre, F. T. Grass-woodland transitions: determinants and consequences for  
491 ecosystem functioning and provisioning of services. *J. Ecol.* **102**, 1357–1362 (2014).
- 492 6. Biederman, J. A. *et al.* Terrestrial carbon balance in a drier world: the effects of water availability in  
493 southwestern North America. *Glob. Change Biol.* **22**, 1867–1879 (2016).
- 494 7. Bestelmeyer, B. T. *et al.* The grassland-shrubland regime shift in the southwestern United States:  
495 misconceptions and their implications for management. *Bioscience* **68**, 678–690 (2018).
- 496 8. Anderson-Teixeira, K. J., Delong, J. P., Fox, A. M., Brese, D. A. & Litvak, M. E. Differential responses  
497 of production and respiration to temperature and moisture drive the carbon balance across a climatic  
498 gradient in New Mexico. *Glob. Change Biol.* **17**, 410–424 (2011).
- 499 9. Petrie, M. D., Collins, S. L., Swann, A. M., Ford, P. L. & Litvak, M. E. Grassland to shrubland state  
500 transitions enhance carbon sequestration in the northern Chihuahuan Desert. *Glob. Change Biol.* **21**,  
501 1226–1235 (2015).
- 502 10. Turnbull, L., Wainwright, J. & Brazier, R. E. Nitrogen and phosphorus dynamics during runoff events  
503 over a transition from grassland to shrubland in the south-western United States. *Hydrol. Process.*  
504 **25**, 1–17 (2011).
- 505 11. Wang, G. *et al.* Post-fire redistribution of soil carbon and nitrogen at a grassland–shrubland ecotone.  
506 *Ecosystems* **22**, 174–188 (2019).
- 507 12. Ratajczak, Z. *et al.* Changes in spatial variance during a grassland to shrubland state transition. *J.*  
508 *Ecol.* **105**, 750–760 (2017).
- 509 13. Sanchez, B. C. & Parmenter, R. R. Patterns of shrub-dwelling arthropod diversity across a desert  
510 shrubland–grassland ecotone: a test of island biogeographic theory. *J. Arid Environ.* **50**, 247–265  
511 (2002).
- 512 14. Lightfoot, D. C., Brantley, S. L. & Allen, C. D. Geographic patterns of ground-dwelling arthropods  
513 across an ecoregional transition in the North American Southwest. *West. North Am. Nat.* **68**, 83–102  
514 (2008).

- 515 15. Pravalie, R. Drylands extent and environmental issues: a global approach. *Earth-Sci. Rev.* **161**, 259–  
516 278 (2016).
- 517 16. UN EMG. Global drylands: a UN system-wide response. *Environ. Manag. Group U. N. Geneva*  
518 [http://www.unccd.int/Lists/SiteDocumentLibrary/Publications/Global\\_Drylands\\_Full\\_Report.pdf](http://www.unccd.int/Lists/SiteDocumentLibrary/Publications/Global_Drylands_Full_Report.pdf)  
519 (2011).
- 520 17. Kovács-Hostyánszki, A. *et al.* Earthworms, spiders and bees as indicators of habitat quality and  
521 management in a low-input farming region—a whole farm approach. *Ecol. Indic.* **33**, 111–120 (2013).
- 522 18. Gonçalves, R. B., Sydney, N. V., Oliveira, P. S. & Artmann, N. O. Bee and wasp responses to a  
523 fragmented landscape in southern Brazil. *J. Insect Conserv.* **18**, 1193–1201 (2014).
- 524 19. Klein, A.-M. *et al.* Importance of pollinators in changing landscapes for world crops. *Proc. R. Soc. B*  
525 *Biol. Sci.* **274**, 303–313 (2007).
- 526 20. Ollerton, J., Winfree, R. & Tarrant, S. How many flowering plants are pollinated by animals? *Oikos*  
527 **120**, 321–326 (2011).
- 528 21. Michener, C. D. *The Bees of the World*. (Johns Hopkins University Press, 2007).
- 529 22. Minckley, R. L. & Ascher, J. S. Preliminary survey of bee (Hymenoptera: Anthophila) richness in the  
530 northwestern Chihuahuan Desert in *Merging Science and Management in a Rapidly Changing World: Biodiversity and Management of the Madrean Archipelago III and 7th Conference on Research and*  
531 *Resource Management in the Southwestern Deserts, Proceedings RMRS-P-67* (eds. Gottfried, G. J.,  
532 Ffolliott, P. F., Gebow, B. S., Eskew, L. G. & Collins, L. C.) 138–143 (U.S. Department of Agriculture,  
533 Forest Service, Rocky Mountain Research Station, 2013).
- 534 23. Minckley, R. L., Cane, J. H. & Kervin, L. Origins and ecological consequences of pollen specialization  
535 among desert bees. *Proc. R. Soc. Lond. B Biol. Sci.* **267**, 265–271 (2000).
- 536 24. Turner, R. M., Bowers, J. E. & Bruggess, T. L. *Sonoran Desert Plants: An Ecological Atlas*. (The  
537 University of Arizona Press, 2005).
- 538 25. Minckley, R. L., Cane, J. H., Kervin, L. & Roulston, T. H. Spatial predictability and resource  
539 specialization of bees (Hymenoptera: Apoidea) at a superabundant, widespread resource. *Biol. J.*  
540 *Linn. Soc.* **67**, 119–147 (1999).
- 541 26. Simpson, B. & Neff, J. Pollination ecology in the Southwest. *Aliso* **11**, 417–440 (1987).
- 542

- 543 27. Memmott, J., Craze, P. G., Waser, N. M. & Price, M. V. Global warming and the disruption of plant-  
544 pollinator interactions. *Ecol. Lett.* **10**, 710–717 (2007).
- 545 28. Kaiser-Bunbury, C. N., Muff, S., Memmott, J., Müller, C. B. & Caflisch, A. The robustness of  
546 pollination networks to the loss of species and interactions: a quantitative approach incorporating  
547 pollinator behaviour. *Ecol. Lett.* **13**, 442–452 (2010).
- 548 29. Klein, A.-M., Steffan-Dewenter, I., Buchori, D. & Tschardt, T. Effects of land-use intensity in tropical  
549 agroforestry systems on coffee flower-visiting and trap-nesting bees and wasps. *Conserv. Biol.* **16**,  
550 1003–1014 (2002).
- 551 30. Brosi, B. J., Daily, G. C., Shih, T. M., Oviedo, F. & Durán, G. The effects of forest fragmentation on  
552 bee communities in tropical countryside. *J. Appl. Ecol.* **45**, 773–783 (2008).
- 553 31. Banaszak-Cibicka, W. & Żmihorski, M. Wild bees along an urban gradient: winners and losers. *J.*  
554 *Insect Conserv.* **16**, 331–343 (2012).
- 555 32. Lara-Romero, C., García, C., Morente-López, J. & Iriondo, J. M. Direct and indirect effects of shrub  
556 encroachment on alpine grasslands mediated by plant-flower visitor interactions. *Funct. Ecol.* **30**,  
557 1521–1530 (2016).
- 558 33. Minckley, R. Faunal composition and species richness differences of bees (Hymenoptera: Apiformes)  
559 from two north American regions. *Apidologie* **39**, 176–188 (2008).
- 560 34. Torné-Noguera, A. *et al.* Determinants of spatial distribution in a bee community: nesting resources,  
561 flower resources, and body size. *PLoS ONE* **9**, e97255 (2014).
- 562 35. Ruttan, A., Filazzola, A. & Lortie, C. J. Shrub-annual facilitation complexes mediate insect community  
563 structure in arid environments. *J. Arid Environ.* **134**, 1–9 (2016).
- 564 36. Renner, S. S. & Zohner, C. M. Climate change and phenological mismatch in trophic interactions  
565 among plants, insects, and vertebrates. *Annu. Rev. Ecol. Evol. Syst.* **49**, 165–182 (2018).
- 566 37. Danforth, B. N. Emergence dynamics and bet hedging in a desert bee, *Perdita portalis*. *Proc. R. Soc.*  
567 *Lond. B Biol. Sci.* **266**, 1985–1994 (1999).
- 568 38. Minckley, R. L., Roulston, T. H. & Williams, N. M. Resource assurance predicts specialist and  
569 generalist bee activity in drought. *Proc. R. Soc. B Biol. Sci.* **280**, 20122703 (2013).

- 570 39. Forrest, J. R. K., Cross, R. & CaraDonna, P. J. Two-year bee, or not two-year bee? How voltinism is  
571 affected by temperature and season length in a high-elevation solitary bee. *Am. Nat.* **193**, 560–574  
572 (2019).
- 573 40. Tylianakis, J. M., Klein, A.-M. & Tschamntke, T. Spatiotemporal variation in the diversity of  
574 Hymenoptera across a tropical habitat gradient. *Ecology* **86**, 3296–3302 (2005).
- 575 41. Simanonok, M. P. & Burkle, L. A. Partitioning interaction turnover among alpine pollination networks:  
576 spatial, temporal, and environmental patterns. *Ecosphere* **5**, art149 (2014).
- 577 42. Rollin, O., Bretagnolle, V., Fortel, L., Guilbaud, L. & Henry, M. Habitat, spatial and temporal drivers of  
578 diversity patterns in a wild bee assemblage. *Biodivers. Conserv.* **24**, 1195–1214 (2015).
- 579 43. Leong, M., Ponisio, L. C., Kremen, C., Thorp, R. W. & Roderick, G. K. Temporal dynamics influenced  
580 by global change: bee community phenology in urban, agricultural, and natural landscapes. *Glob.*  
581 *Change Biol.* **22**, 1046–1053 (2016).
- 582 44. Tucker, E. M. & Rehan, S. M. Farming for bees: annual variation in pollinator populations across  
583 agricultural landscapes. *Agric. For. Entomol.* **20**, 541–548 (2018).
- 584 45. Peters, D. P. C. & Yao, J. Long-term experimental loss of foundation species: consequences for  
585 dynamics at ecotones across heterogeneous landscapes. *Ecosphere* **3**, art27 (2012).
- 586 46. Collins, S. L. & Xia, Y. Long-term dynamics and hotspots of change in a desert grassland plant  
587 community. *Am. Nat.* **185**, E30–E43 (2015).
- 588 47. He, Y., D’Odorico, P. & De Wekker, S. F. J. The role of vegetation-microclimate feedback in  
589 promoting shrub encroachment in the northern Chihuahuan desert. *Glob. Change Biol.* **21**, 2141–  
590 2154 (2015).
- 591 48. Wilson, J. S., Griswold, T. & Messinger, O. J. Sampling bee communities (Hymenoptera: Apiformes)  
592 in a desert landscape: are pan traps sufficient? *J. Kans. Entomol. Soc.* **81**, 288–300 (2008).
- 593 49. Cane, J. H., Minckley, R. L. & Kervin, L. J. Sampling bees (Hymenoptera: Apiformes) for pollinator  
594 community studies: pitfalls of pan-trapping. *J. Kans. Entomol. Soc.* **73**, 225–231 (2000).
- 595 50. Baum, K. A. & Wallen, K. E. Potential bias in pan trapping as a function of floral abundance. *J. Kans.*  
596 *Entomol. Soc.* **84**, 155–159 (2011).

- 597 51. Wickham, H. Reshaping data with the reshape package. *J. Stat. Softw.* **21**, 10.18637/jss.v021.i12  
598 (2007).
- 599 52. R Core Team. *R: A Language and Environment for Statistical Computing*. (R Foundation for  
600 Statistical Computing, 2017).
- 601 53. Clarke, K. R. & Gorley, R. N. *Primer Version 6.1.10 User Manual and Tutorial*. (Primer-E, 2009).
- 602 54. Hallett, L. *et al.* codyn: community dynamics metrics, R package version 2.0.2. 10.5063/F1N877Z6  
603 (2019).
- 604 55. Roberts, D. W. labdsv: ordination and multivariate analysis for ecology. [https://CRAN.R-](https://CRAN.R-project.org/package=labdsv)  
605 [project.org/package=labdsv](https://CRAN.R-project.org/package=labdsv) (2016).
- 606 56. Oksanen, J. *et al.* vegan: community ecology package, version 2.2-1. [http://CRAN.R-](http://CRAN.R-project.org/package=vegan)  
607 [project.org/package=vegan](http://CRAN.R-project.org/package=vegan) (2015).
- 608 57. Bates, D., Mächler, M., Bolker, B. & Walker, S. Fitting linear mixed-effects models using lme4. *J. Stat.*  
609 *Softw.* **67**, 1–48 (2015).
- 610 58. Lenth, R. V., Singmann, H., Love, J., Buerkner, P. & Herve, M. emmeans: estimated marginal means,  
611 aka least-squares means. <https://cran.r-project.org/web/packages/emmeans/index.html> (2018).
- 612 59. Collins, S. L. *et al.* A multiscale, hierarchical model of pulse dynamics in arid-land ecosystems. *Annu.*  
613 *Rev. Ecol. Evol. Syst.* **45**, 397–419 (2014).
- 614 60. Rudgers, J. A. *et al.* Climate sensitivity functions and net primary production: a framework for  
615 incorporating climate mean and variability. *Ecology* **99**, 576–582 (2018).
- 616 61. Ogilvie, J. E. & Forrest, J. R. Interactions between bee foraging and floral resource phenology shape  
617 bee populations and communities. *Curr. Opin. Insect Sci.* **21**, 75–82 (2017).
- 618 62. Redhead, J. W. *et al.* Effects of habitat composition and landscape structure on worker foraging  
619 distances of five bumble bee species. *Ecol. Appl.* **26**, 726–739 (2016).
- 620 63. Greenleaf, S. S., Williams, N. M., Winfree, R. & Kremen, C. Bee foraging ranges and their  
621 relationship to body size. *Oecologia* **153**, 589–596 (2007).
- 622 64. Horn, J., Becher, M. A., Kennedy, P. J., Osborne, J. L. & Grimm, V. Multiple stressors: using the  
623 honeybee model BEEHAVE to explore how spatial and temporal forage stress affects colony  
624 resilience. *Oikos* **125**, 1001–1016 (2016).

- 625 65. He, Y., D'Odorico, P., De Wekker, S. F. J., Fuentes, J. D. & Litvak, M. On the impact of shrub  
626 encroachment on microclimate conditions in the northern Chihuahuan desert. *J. Geophys. Res.–*  
627 *Atmospheres* **115**, D21120 (2010).
- 628 66. Radmacher, S. & Strohm, E. Effects of constant and fluctuating temperatures on the development of  
629 the solitary bee *Osmia bicornis* (Hymenoptera: Megachilidae). *Apidologie* **42**, 711–720 (2011).
- 630 67. Bestelmeyer, B. T. Does desertification diminish biodiversity? Enhancement of ant diversity by shrub  
631 invasion in south-western USA. *Divers. Distrib.* **11**, 45–55 (2005).
- 632 68. Rominger, A. J., Miller, T. E. X. & Collins, S. L. Relative contributions of neutral and niche-based  
633 processes to the structure of a desert grassland grasshopper community. *Oecologia* **161**, 791–800  
634 (2009).
- 635 69. Blaum, N., Seymour, C., Rossmannith, E., Schwager, M. & Jeltsch, F. Changes in arthropod diversity  
636 along a land use driven gradient of shrub cover in savanna rangelands: identification of suitable  
637 indicators. *Biodivers. Conserv.* **18**, 1187–1199 (2009).
- 638 70. Bates, A. J. *et al.* Changing bee and hoverfly pollinator assemblages along an urban-rural gradient.  
639 *PLoS ONE* **6**, e23459 (2011).
- 640 71. Tonietto, R., Fant, J., Ascher, J., Ellis, K. & Larkin, D. A comparison of bee communities of Chicago  
641 green roofs, parks and prairies. *Landsc. Urban Plan.* **103**, 102–108 (2011).
- 642 72. Cook, B. I. & Seager, R. The response of the North American Monsoon to increased greenhouse gas  
643 forcing. *J. Geophys. Res.–Atmos.* **118**, 1690–1699 (2013).
- 644 73. Michener, C. D. *The Social Behavior of the Bees: A Comparative Study*. (Belknap Press of Harvard  
645 University Press, 1974).
- 646 74. Cook, B. I., Ault, T. R. & Smerdon, J. E. Unprecedented 21st century drought risk in the American  
647 Southwest and Central Plains. *Sci. Adv.* **1**, e1400082 (2015).
- 648 75. Bowers, J. E. & Dimmitt, M. A. Flowering phenology of six woody plants in the Northern Sonoran  
649 Desert. *Bull. Torrey Bot. Club* **121**, 215–229 (1994).
- 650 76. CaraDonna, P. J. *et al.* Interaction rewiring and the rapid turnover of plant–pollinator networks. *Ecol.*  
651 *Lett.* **20**, 385–394 (2017).



- 652 77. Ellison, A. M. *et al.* Loss of foundation species: consequences for the structure and dynamics of  
653 forested ecosystems. *Front. Ecol. Environ.* **3**, 479–486 (2005).
- 654 78. Schuh, R. T., Hewson-Smith, S. & Ascher, J. S. Specimen databases: a case study in entomology  
655 using web-based software. *Am. Entomol.* **56**, 206–216 (2010).
- 656 79. Sipes, S. D. & Tepedino, V. J. Pollen-host specificity and evolutionary patterns of host switching in a  
657 clade of specialist bees (Apoidea: *Diadasia*). *Biol. J. Linn. Soc.* **86**, 487–505 (2005).
- 658 80. Hurd, P. D. & Linsley, E. G. The principal *Larrea* bees of the southwestern United States  
659 (Hymenoptera, Apoidea). *Smithson. Contrib. Zool.* 1–74 (1975).
- 660 81. Danforth, B. N., Ji, S. & Ballard, L. J. Gene flow and population structure in an oligolectic desert bee,  
661 *Macrotera (Macroteropsis) portalis* (Hymenoptera: Andrenidae). *J. Kans. Entomol. Soc.* **76**, 221–235  
662 (2003).
- 663 82. Sheffield, C. S., Pindar, A., Packer, L. & Kevan, P. G. The potential of cleptoparasitic bees as  
664 indicator taxa for assessing bee communities. *Apidologie* **44**, 501–510 (2013).

665

## 666 **Acknowledgements**

667 Funding was provided by the NSF Long Term Ecological Research program (DEB-1655499) and  
668 the University of New Mexico Department of Biology. We thank David Lightfoot, Olivia Messinger Carril,  
669 and Jade McLaughlin for their contributions to this work.

670

## 671 **Author contributions**

672 M.R.K. assisted with bee specimen collection, analyzed the data, and wrote the manuscript.  
673 K.W.W. designed the study and completed the majority of specimen collection and identification. J.B.  
674 assisted with specimen collection and identification. T.L.G. identified specimens and provided taxonomic  
675 expertise. J.A.R. and K.D.W. contributed to manuscript conceptual framing, data analysis, and writing. All  
676 authors contributed to revising the manuscript.

677

## 678 **Competing interests**

679 The authors declare no competing interests.

680

681 **Figure legends**

682 Figure 1. Non-metric multidimensional scaling (NMDS) plot depicting variation in bee species composition  
683 among three dryland ecosystem types: Plains grassland (blue points), Chihuahuan Desert grassland  
684 (black points), and Chihuahuan Desert shrubland (green points). NMDS was run with 500 randomized re-  
685 starts and 2D stress = 0.13. On average, all ecosystem types significantly differed from one another  
686 (Table 2): Plains grassland versus Chihuahuan Desert grassland ( $P = 0.0082$ ), Plains grassland versus  
687 Chihuahuan Desert shrubland ( $P = 0.0075$ ), and Chihuahuan Desert grassland versus shrubland ( $P =$   
688 0.0084).

689

690 Figure 2. Mean yearly abundance + s.e. (darker, leftmost bar in each pair) and Dufrene-Legendre (DL)  
691 indicator species value (lighter, rightmost bar in each pair) for important bee species within each  
692 ecosystem type (Plains grassland, blue bars, B; Chihuahuan Desert grassland, black bars, G;  
693 Chihuahuan Desert shrubland, green bars, C). Included bee species were within the 20 most abundant  
694 species found across the study, and/or were top indicator species of particular ecosystem types  
695 according to DL indicator value. Plots are arranged from left to right by mean yearly abundance across  
696 ecosystem types.

697

698 Figure 3. Non-metric multidimensional scaling (NMDS) plots depicting variation in bee species  
699 composition among months for three dryland ecosystems: (a) Plains grassland, (b) Chihuahuan Desert  
700 grassland, and (c) Chihuahuan Desert shrubland. NMDS was run with all samples together, with 500  
701 randomized re-starts and 2D stress = 0.13.

702

703 Figure 4. Variation across sampling months in per-transect bee abundance and diversity ( $\pm$  s.e.) as  
704 measured by a) total bee abundance, b) Shannon diversity index ( $H'$ ), c) richness, and d) evenness  
705 (Pielou's  $J$ ) for three dryland ecosystem types: Plains grassland (blue points), Chihuahuan Desert  
706 grassland (black points), and Chihuahuan Desert shrubland (green points). Letters denote contrasts  
707 between biomes within a given month; biomes labeled with different letters differed significantly from one

708 another in the relevant abundance/diversity metric. Points lacking letters did not differ significantly from  
709 any other biome in the given month. For total abundance, s.e. values were  $<0.1$ .

710

711 Figure 5. Total bee species turnover between pairs of months (indicated on the x-axis) for three dryland  
712 ecosystem types: Plains grassland (blue points), Chihuahuan Desert grassland (black points), and  
713 Chihuahuan Desert shrubland (green points).

714

715 Figure 6. Average rate of bee assemblage change during March through October in three ecosystem  
716 types: Plains grassland (slope = 9.34, s.e. = 4.99,  $t = 1.9$ ,  $P = 0.0725$ ), Chihuahuan Desert grassland  
717 (slope = 24.32, s.e. = 3.99,  $t = 6.1$ ,  $P < 0.0001$ ), and Chihuahuan Desert shrubland (slope = 7.81, s.e. =  
718 2.92,  $t = 2.7$ ,  $P = 0.0128$ ). Intervals (x-axis) represent time lags between all pairwise combinations of  
719 months. Distances (y-axis) correspond with differences in bee assemblage composition between pairs of  
720 months, calculated as Euclidean distances. The slope of each line indicates the rate of bee assemblage  
721 change in each ecosystem.

722

723 Table 1. Latitude, longitude, and elevation of study sites representing three ecosystem types of the  
724 southwestern U.S., along with current versus predicted future foundation species.  
725

| Ecosystem type   | Latitude | Longitude | Elevation (m) | Current foundation species | Future foundation species |
|------------------|----------|-----------|---------------|----------------------------|---------------------------|
| Desert shrubland | 34.3431  | -106.7417 | 1615          | Creosote bush              | Creosote bush             |
| Desert grassland | 34.3350  | -106.7219 | 1616          | Black grama                | Creosote bush             |
| Plains grassland | 34.3325  | -106.6328 | 1670          | Blue grama                 | Black grama               |

726

727 Table 2. Results of 1) perMANOVA with 9999 permutations to test for the influence of ecosystem type  
728 and month of sample collection on bee assemblage composition, using a Bray-Curtis similarity metric,  
729 and 2) permDISP examining differences among ecosystem types and months in bee assemblage  
730 dispersion.  
731

|                      | <i>num. df</i> | perMANOVA |           |                 |          | permDISP         |          |          |
|----------------------|----------------|-----------|-----------|-----------------|----------|------------------|----------|----------|
|                      |                | <i>SS</i> | <i>MS</i> | <i>pseudo-F</i> | <i>P</i> | <i>denom. df</i> | <i>F</i> | <i>P</i> |
| Ecosystem            | 2              | 23252.00  | 11626.00  | 34.54           | 0.0001   | 117              | 0.52     | 0.7074   |
| Month                | 7              | 139860.00 | 19981.00  | 94.02           | 0.0001   | 112              | 5.92     | 0.0002   |
| Ecosystem x month    | 14             | 34139.00  | 2438.50   | 11.48           | 0.0001   |                  |          |          |
| Transect (ecosystem) | 12             | 4039.70   | 336.64    | 1.58            | 0.0003   |                  |          |          |
| Residuals            | 84             | 17851.00  | 212.51    |                 |          |                  |          |          |

732

733 Table 3. Indicator species for each ecosystem (Plains grassland, Chihuahuan Desert grassland, and  
 734 Chihuahuan Desert shrubland) according to Dufrene-Legendre indicator species value. Species are listed  
 735 from highest to lowest indicator value within each ecosystem.  
 736

| Species                                  | Family       | Indicator value | P-value |
|------------------------------------------|--------------|-----------------|---------|
| Plains grassland                         |              |                 |         |
| <i>Colletes scopiventer</i>              | Colletidae   | 0.64            | 0.0010  |
| <i>Halictus ligatus</i>                  | Halictidae   | 0.62            | 0.0010  |
| <i>Anthophora montana</i>                | Apidae       | 0.52            | 0.0010  |
| <i>Agapostemon angelicus</i>             | Halictidae   | 0.50            | 0.0010  |
| <i>Halictus tripartitus</i>              | Halictidae   | 0.41            | 0.0010  |
| <i>Anthidium porterae</i>                | Megachilidae | 0.27            | 0.0280  |
| <i>Sphecodes</i> sp. 1                   | Halictidae   | 0.27            | 0.0010  |
| <i>Anthophora urbana</i>                 | Apidae       | 0.26            | 0.0190  |
| <i>Melecta alexanderi</i>                | Apidae       | 0.20            | 0.0390  |
| <i>Sphecodes</i> sp. 5                   | Halictidae   | 0.18            | 0.0250  |
| <i>Melissodes thelypodii thelypodii</i>  | Apidae       | 0.17            | 0.0090  |
| <i>Sphecodes</i> sp. 6                   | Halictidae   | 0.15            | 0.0090  |
| <i>Megachile polcaris</i>                | Megachilidae | 0.14            | 0.0110  |
| <i>Pseudopanurgus</i> sp. 2              | Andrenidae   | 0.10            | 0.0210  |
| Chihuahuan Desert grassland              |              |                 |         |
| <i>Lasioglossum (Dialictus)</i> sp. 2    | Halictidae   | 0.66            | 0.0010  |
| <i>Lasioglossum semicaeruleum</i>        | Halictidae   | 0.51            | 0.0010  |
| <i>Diadasia megamorpha</i>               | Apidae       | 0.20            | 0.0250  |
| <i>Perdita sphaeralceae alticola</i>     | Andrenidae   | 0.18            | 0.0020  |
| <i>Megachile sublaurita</i>              | Megachilidae | 0.16            | 0.0240  |
| <i>Perdita cara</i>                      | Andrenidae   | 0.15            | 0.0160  |
| <i>Atoposmia</i> aff. <i>daleae</i>      | Megachilidae | 0.10            | 0.0330  |
| <i>Atoposmia</i> aff. <i>daleae</i> 2    | Megachilidae | 0.10            | 0.0420  |
| Chihuahuan Desert shrubland              |              |                 |         |
| <i>Agapostemon melliventris</i>          | Halictidae   | 0.56            | 0.0010  |
| <i>Perdita larreae</i>                   | Andrenidae   | 0.50            | 0.0010  |
| <i>Neolarra vigilans</i>                 | Apidae       | 0.45            | 0.0010  |
| <i>Perdita marcialis</i>                 | Andrenidae   | 0.42            | 0.0010  |
| <i>Perdita diversa</i>                   | Andrenidae   | 0.40            | 0.0010  |
| <i>Lasioglossum</i> aff. <i>pervarum</i> | Halictidae   | 0.40            | 0.0080  |
| <i>Lasioglossum (Dialictus)</i> sp. 8    | Halictidae   | 0.39            | 0.0010  |
| <i>Ashmeadiella meliloti</i>             | Megachilidae | 0.35            | 0.0440  |
| <i>Anthophorula completa</i>             | Apidae       | 0.33            | 0.0010  |
| <i>Lasioglossum morrilli</i>             | Halictidae   | 0.32            | 0.0240  |
| <i>Lasioglossum (Dialictus)</i> sp. 7    | Halictidae   | 0.31            | 0.0050  |
| <i>Ashmeadiella bigeloveae</i>           | Megachilidae | 0.27            | 0.0160  |
| <i>Ashmeadiella cactorum</i>             | Megachilidae | 0.25            | 0.0060  |
| <i>Macrotera portalis</i>                | Andrenidae   | 0.22            | 0.0090  |
| <i>Dianthidium implicatum</i>            | Megachilidae | 0.20            | 0.0010  |
| <i>Anthophora cinerula</i>               | Apidae       | 0.19            | 0.0110  |
| <i>Anthidium cockerelli</i>              | Megachilidae | 0.17            | 0.0070  |
| <i>Perdita austini</i>                   | Andrenidae   | 0.16            | 0.0040  |
| <i>Apis mellifera</i>                    | Apidae       | 0.16            | 0.0410  |
| <i>Megachile lobatifrons</i>             | Megachilidae | 0.14            | 0.0140  |
| <i>Megachile spinotulata</i>             | Megachilidae | 0.11            | 0.0370  |

737

738 Table 4. Results of linear mixed effects models testing the influences of ecosystem type and month of  
739 sample collection on total bee abundance, as well as bee assemblage Shannon diversity index ( $H'$ ),  
740 richness, and evenness (Pielou's  $J$ ).  
741

|                   | <i>df</i> | Total abundance |          | Shannon $H'$ |          | Richness |          | Evenness |          |
|-------------------|-----------|-----------------|----------|--------------|----------|----------|----------|----------|----------|
|                   |           | $\chi^2$        | <i>P</i> | $\chi^2$     | <i>P</i> | $\chi^2$ | <i>P</i> | $\chi^2$ | <i>P</i> |
| Ecosystem         | 2         | 45.19           | < 0.0001 | 34.72        | < 0.0001 | 1.38     | 0.50044  | 47.28    | < 0.0001 |
| Month             | 7         | 796.09          | < 0.0001 | 105.64       | < 0.0001 | 221.14   | < 0.0001 | 85.33    | < 0.0001 |
| Ecosystem x month | 14        | 359.31          | < 0.0001 | 142.78       | < 0.0001 | 28.13    | 0.01368  | 320.07   | < 0.0001 |

742

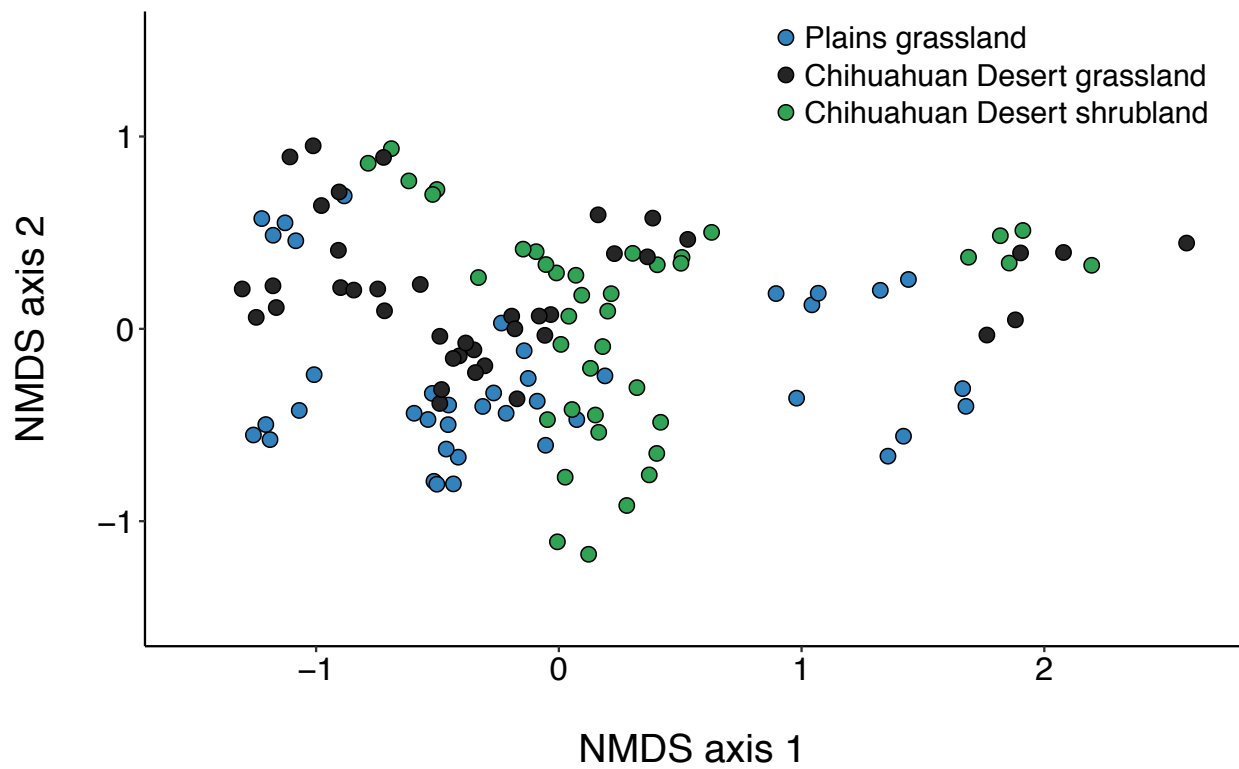

743  
744 **Figure 1**



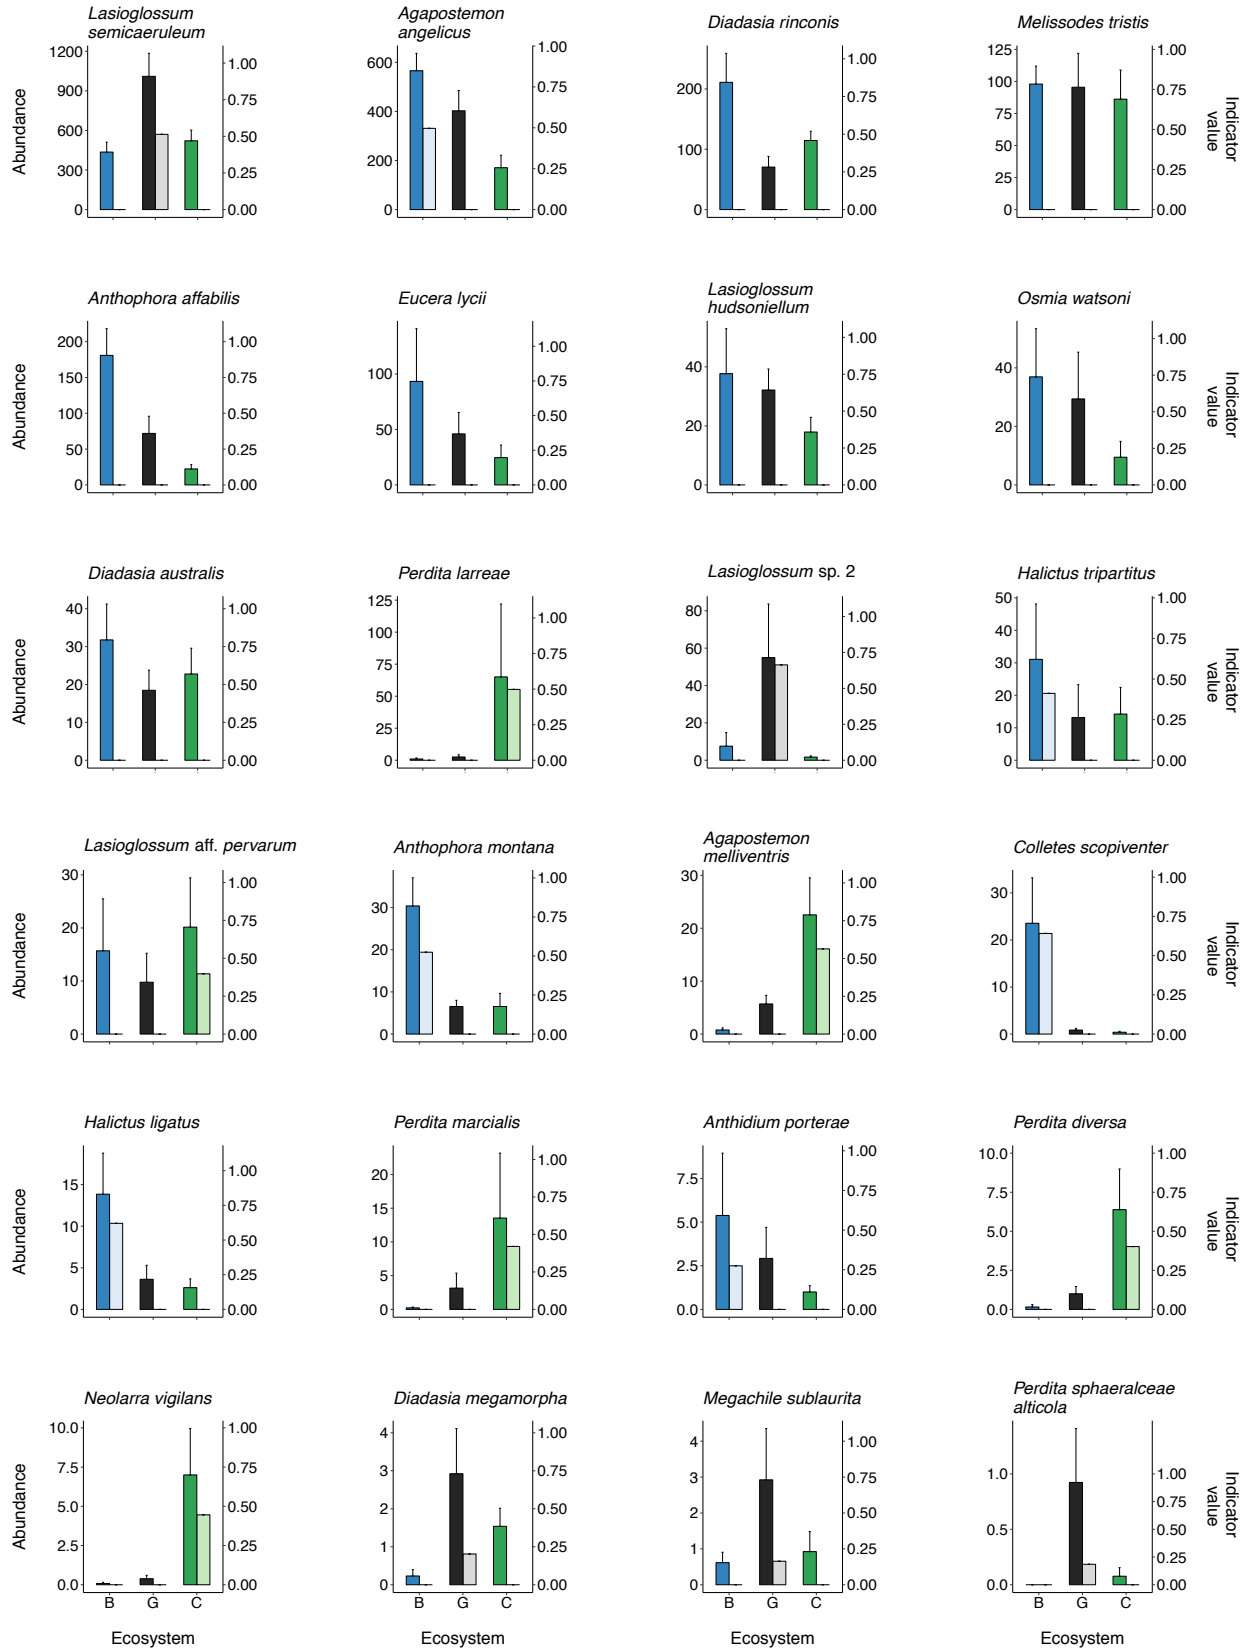

745  
746  
747

Figure 2

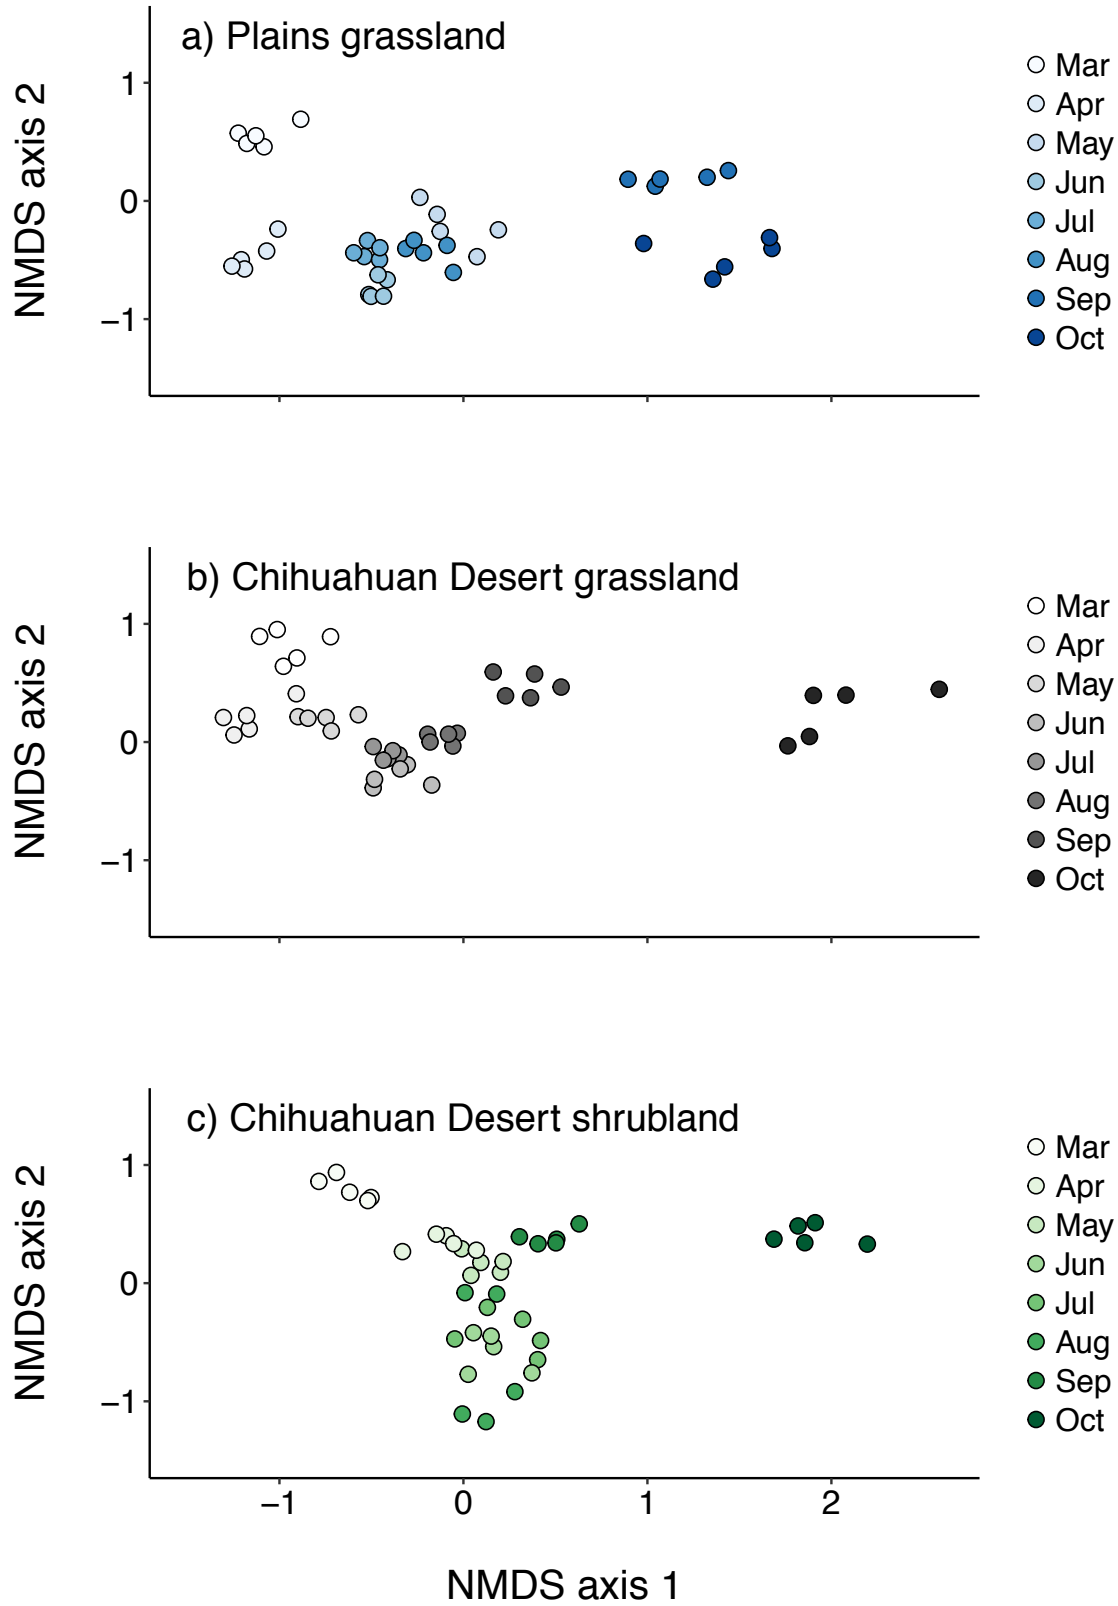

748  
749  
750

Figure 3

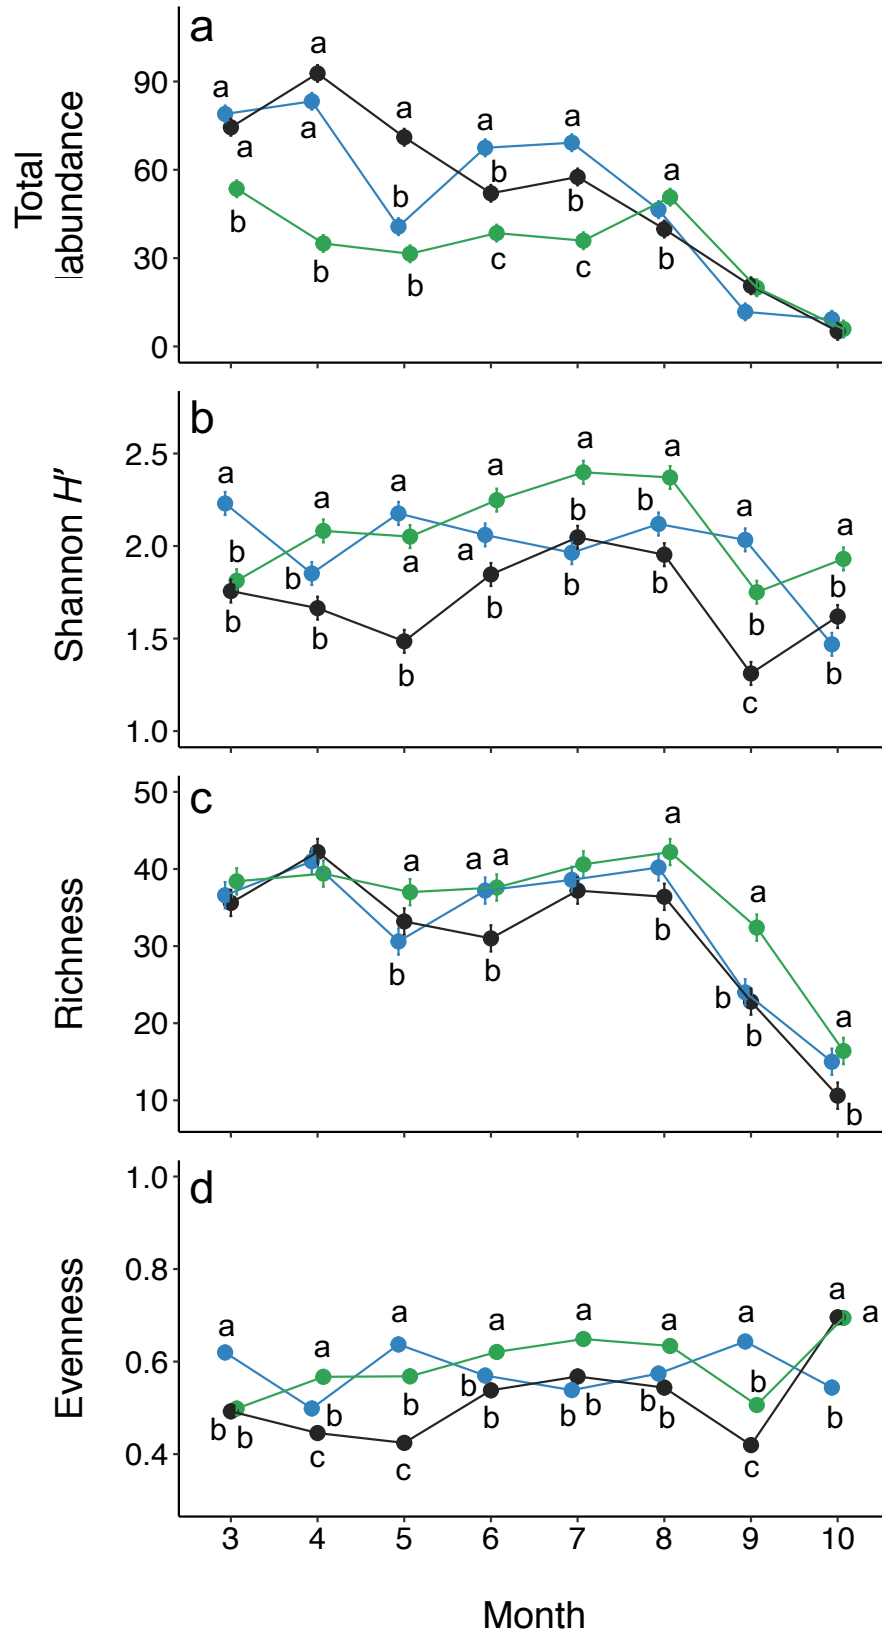

751  
752  
753 **Figure 4**

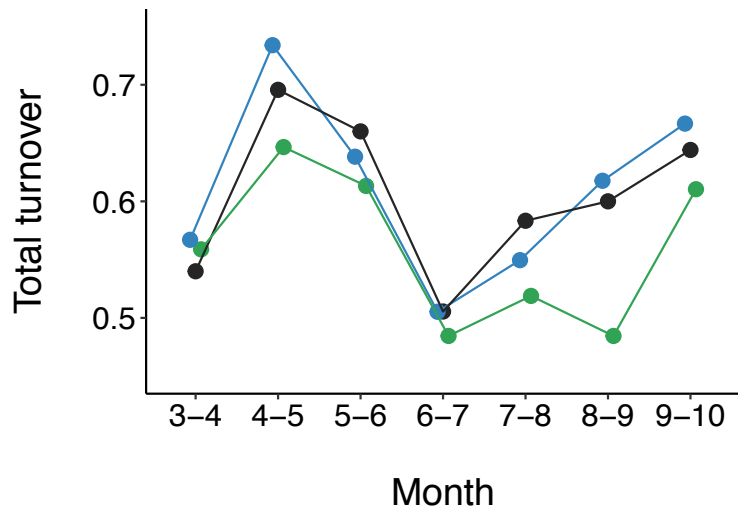

754  
755  
756

**Figure 5**

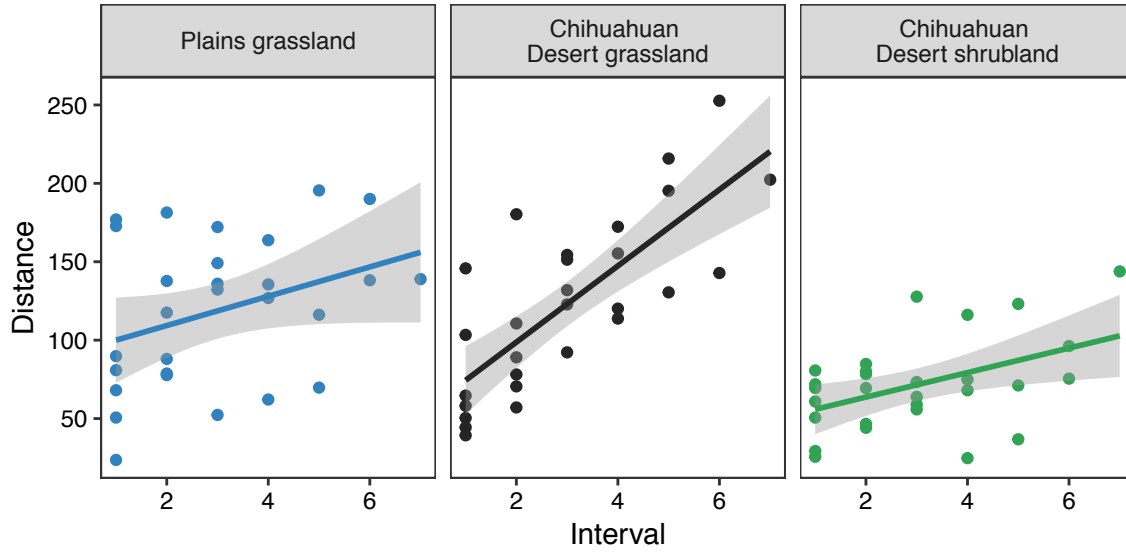

757  
758  
759

**Figure 6**
